# Supplementary material
Source: PubMed Central journal article supplement (PMC9339499)

**Fig 3A**

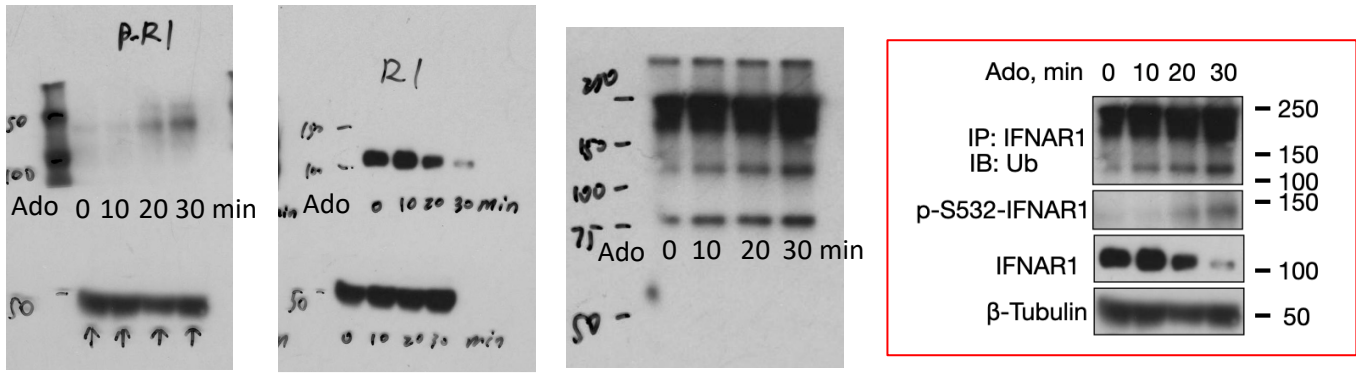

**Fig 3B**

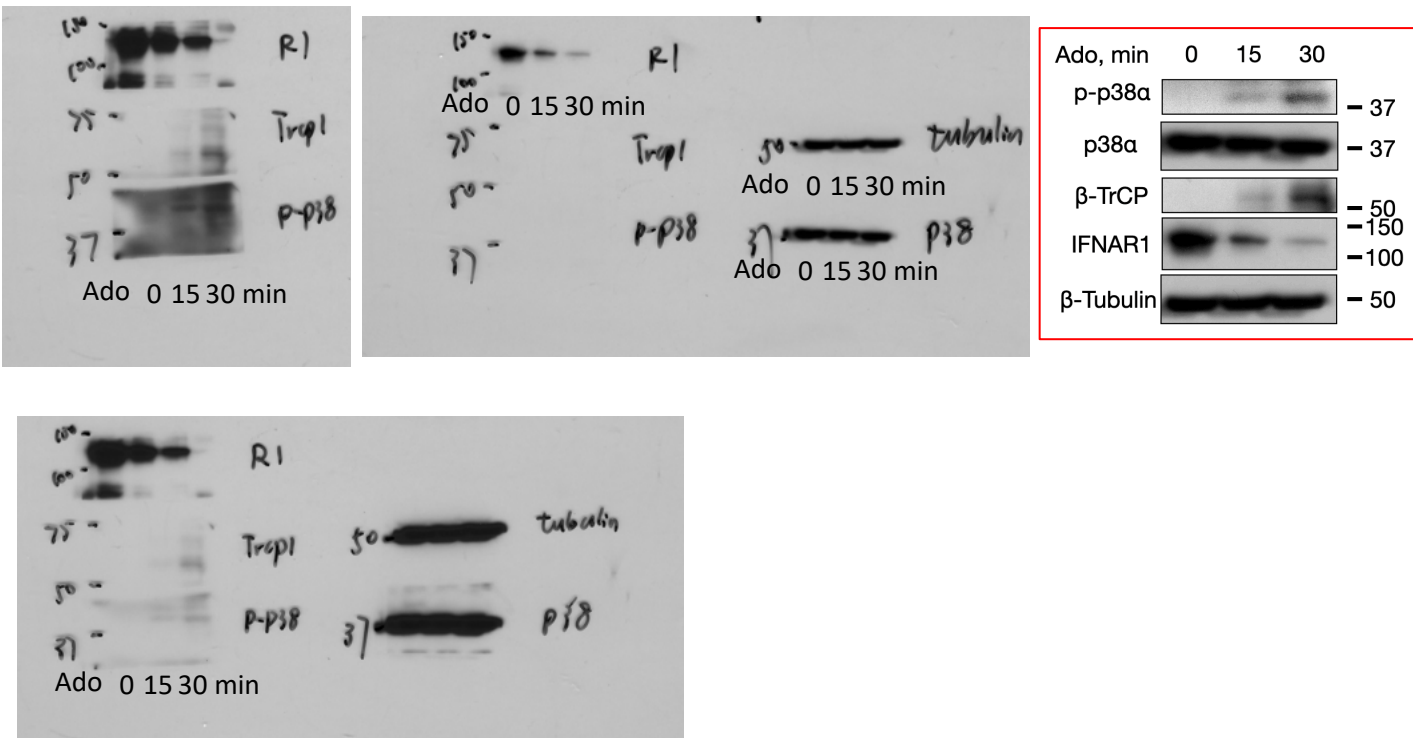

Fig 3E

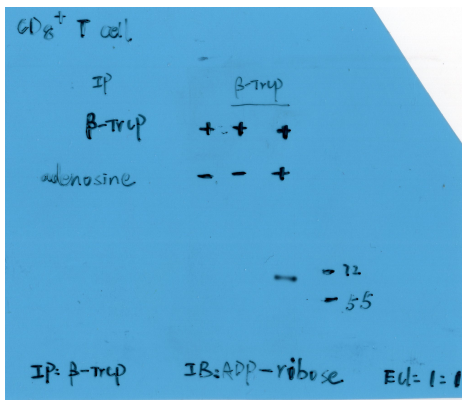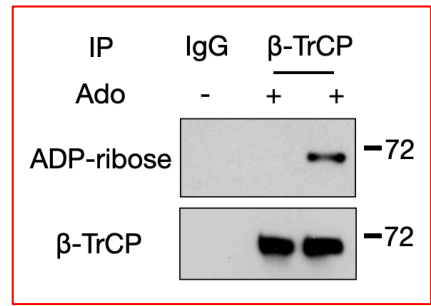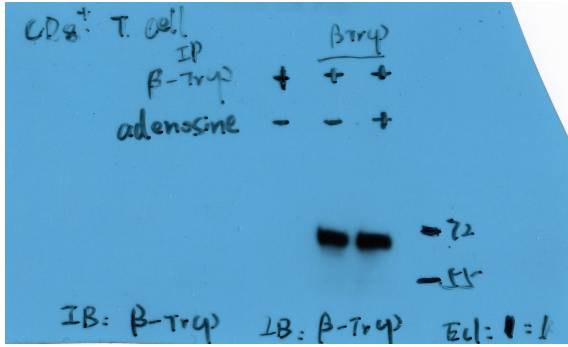

Fig 3F

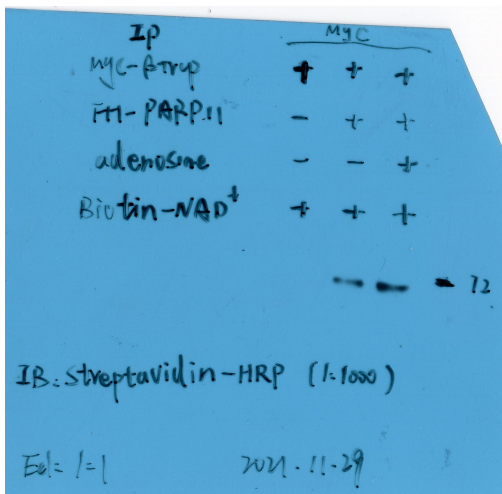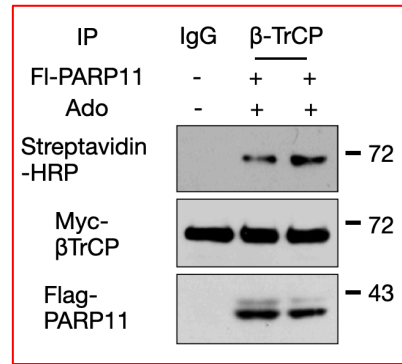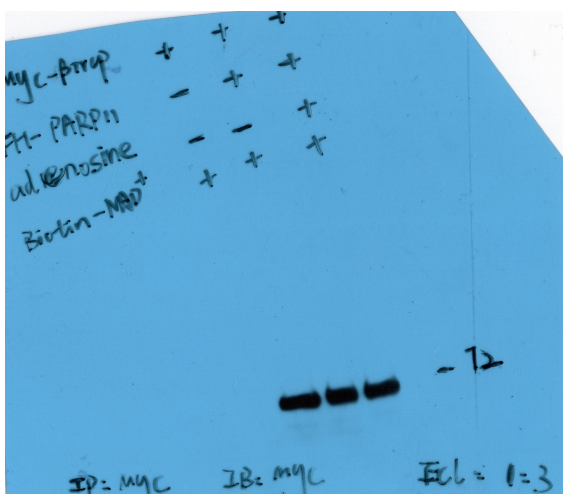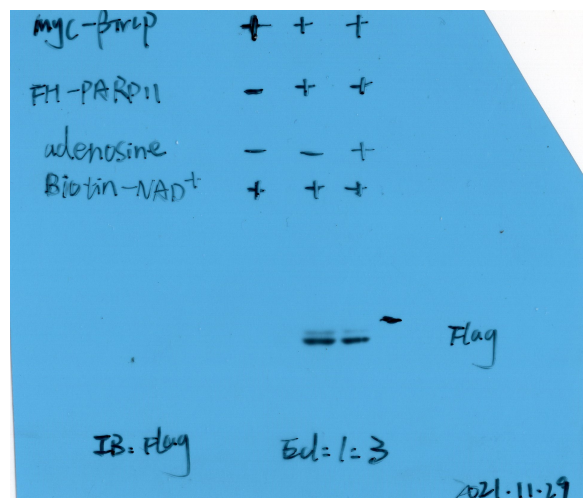

Fig 3I

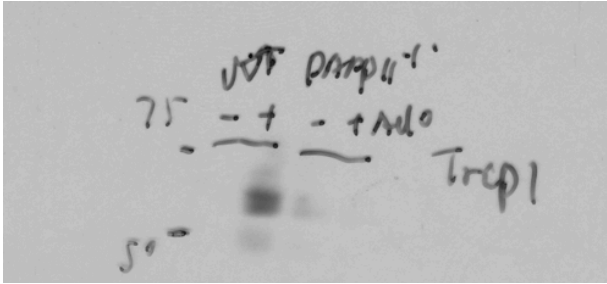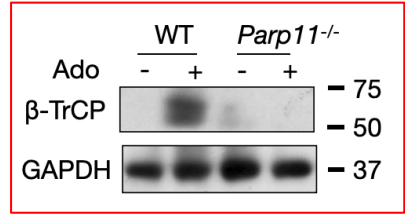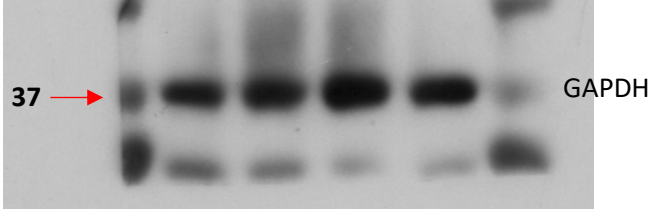

Fig S3C

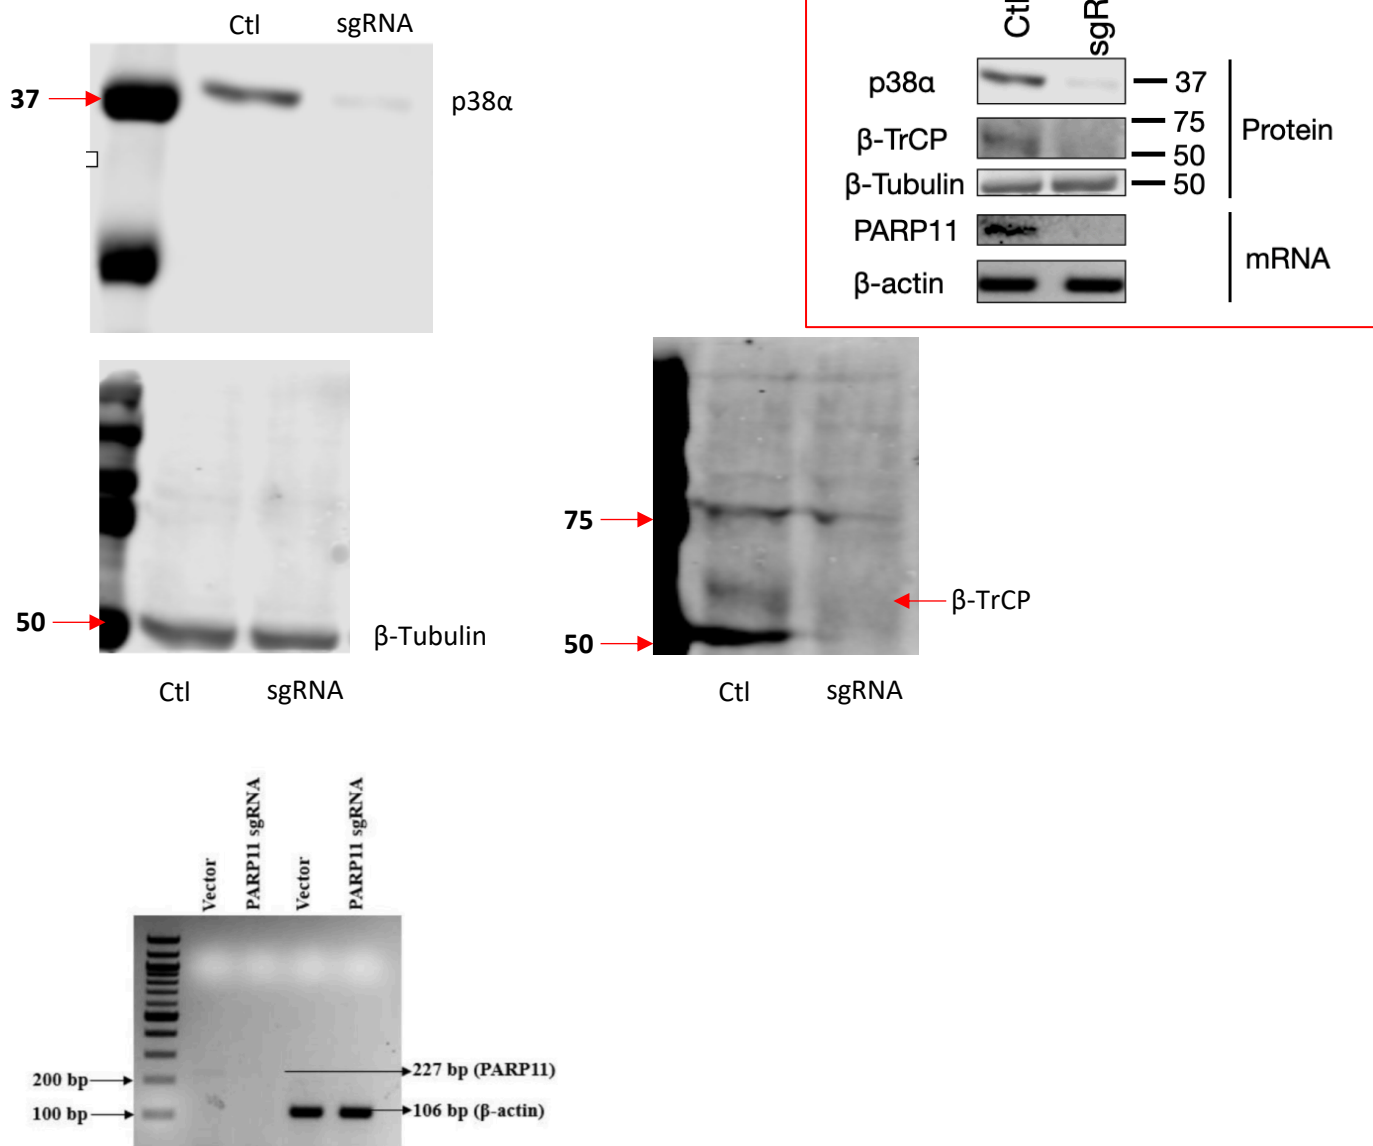

Fig S3D

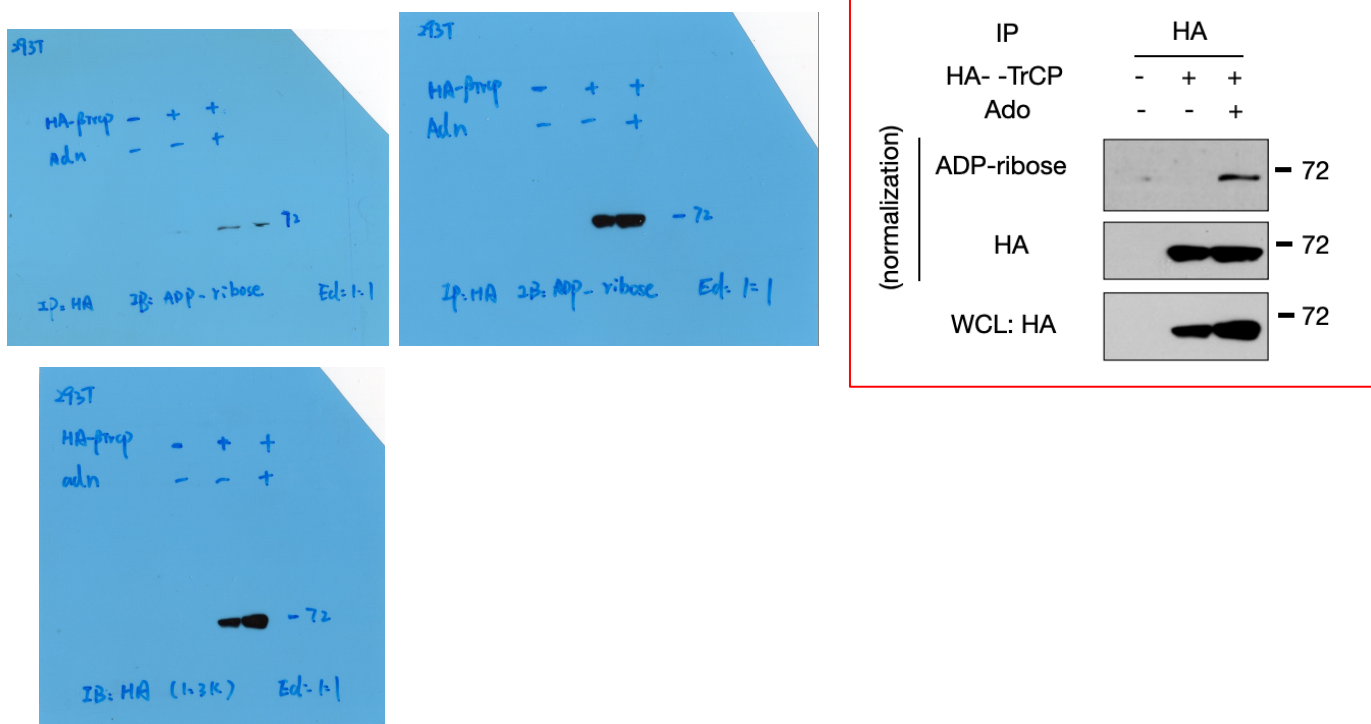

Fig 7A

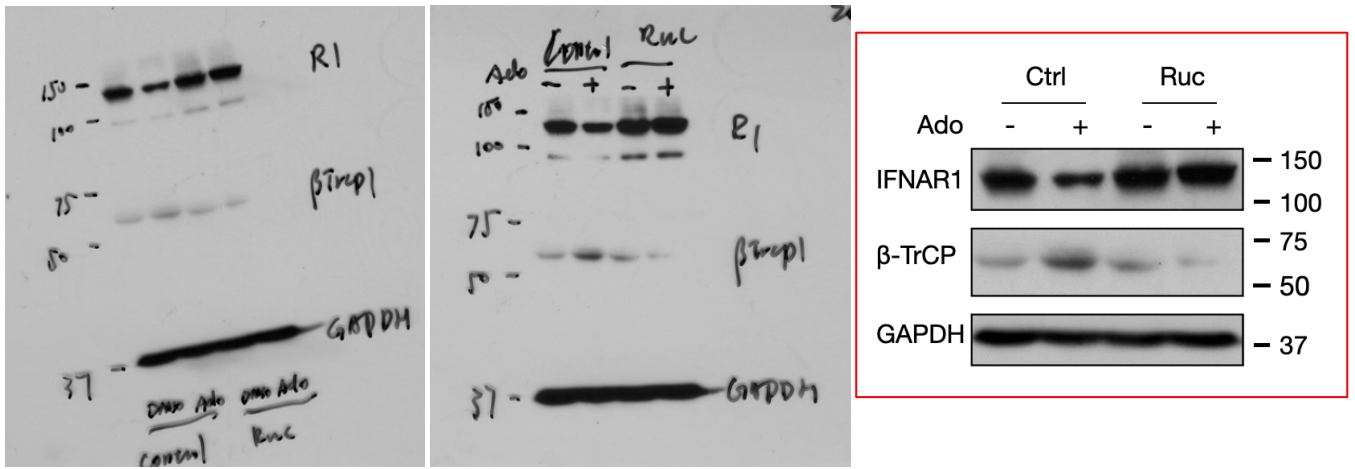

Supplement: NIHMS1800982-supplement-s_image_3.pdf [file NIHMS1800982-supplement-s_image_3.pdf]

Fig 7A



Supplement: NIHMS1800982-supplement-s_image_7.pdf [file NIHMS1800982-supplement-s_image_7.pdf]

Extended Data Fig3C

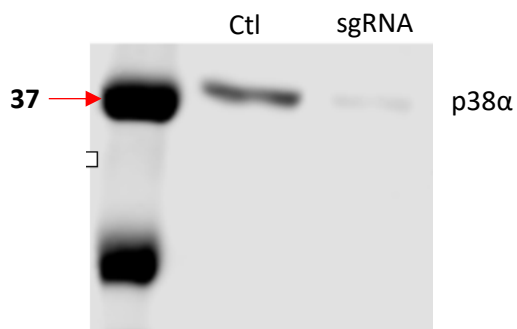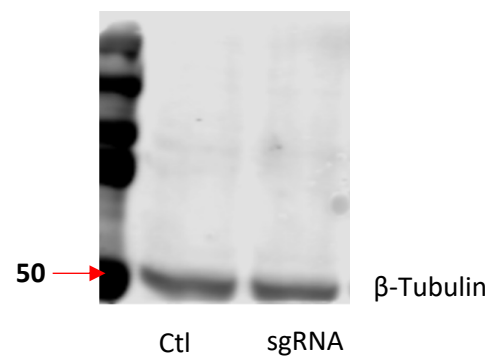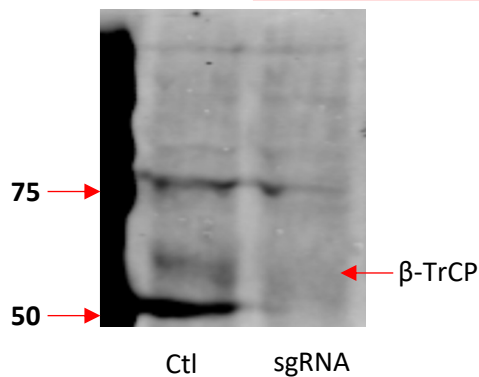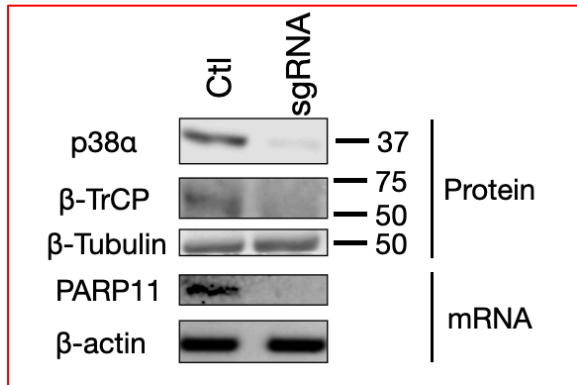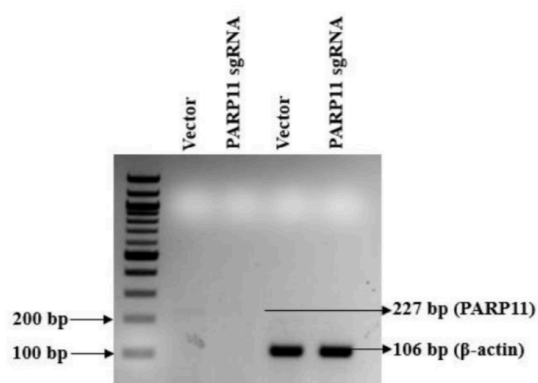

Extended Data Fig3D

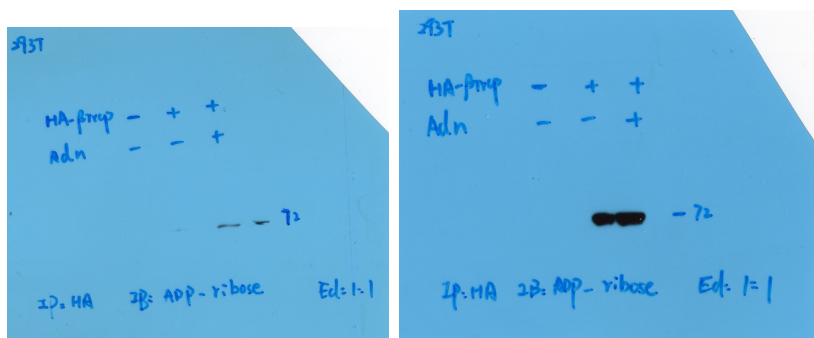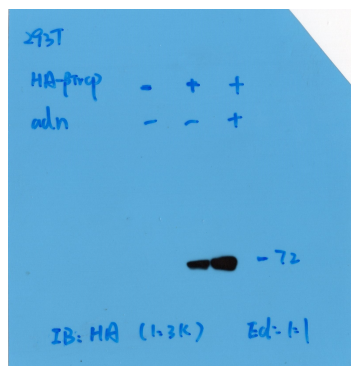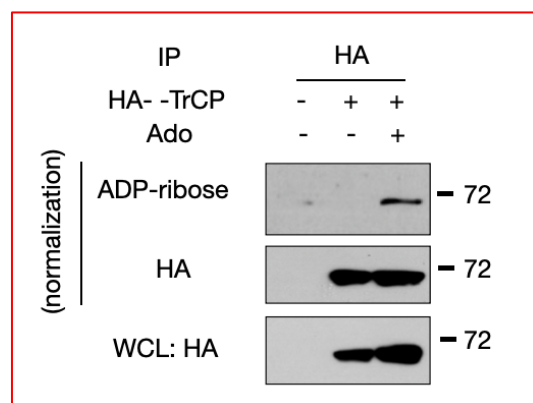

Supplement: NIHMS1800982-supplement-s_image_ex3.pdf [file NIHMS1800982-supplement-s_image_ex3.pdf]
